# Supplementary material for: Biomimetic metal oxides for the extraction of nanoparticles from water
Source: Royal Society of Chemistry journal article supplement (doi:10.1039/c3nr34221b), 2013-01-01
Supplement: c3nr34221b.pdf [file c3nr34221b.pdf]

## Supporting information

### Biomimetic synthesis of metal oxides for the extraction of nanoparticles from water

Ramakrishna Mallampati and Suresh Valiyaveetil\*

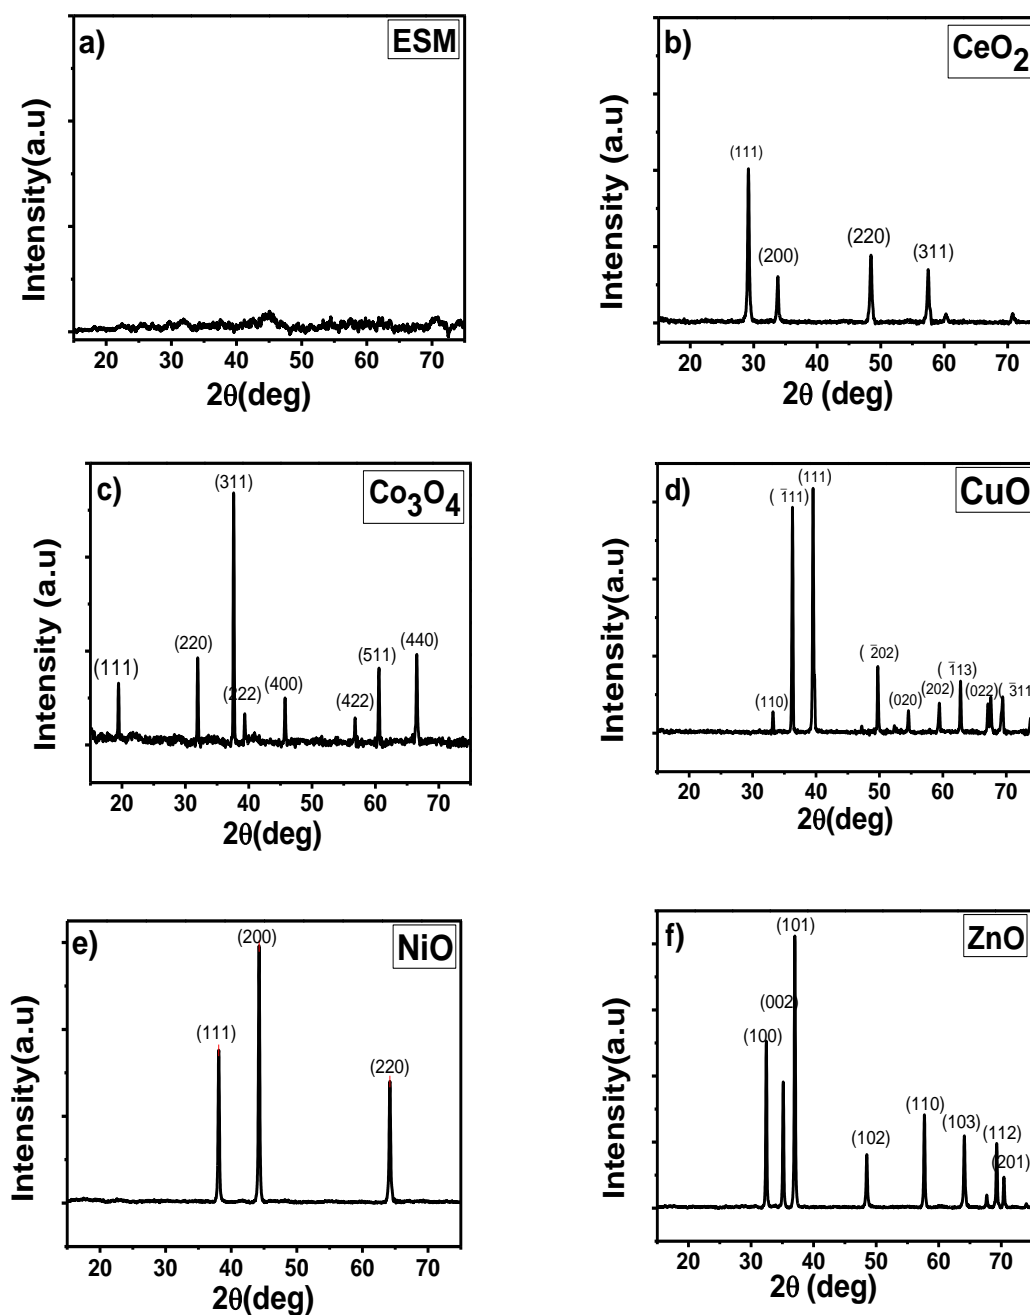

**Figure S1.** X-ray diffraction pattern of a) natural ESM, b)  $\text{CeO}_2$ , c)  $\text{Co}_3\text{O}_4$ , d)  $\text{CuO}$ , e)  $\text{NiO}$  and f)  $\text{ZnO}$

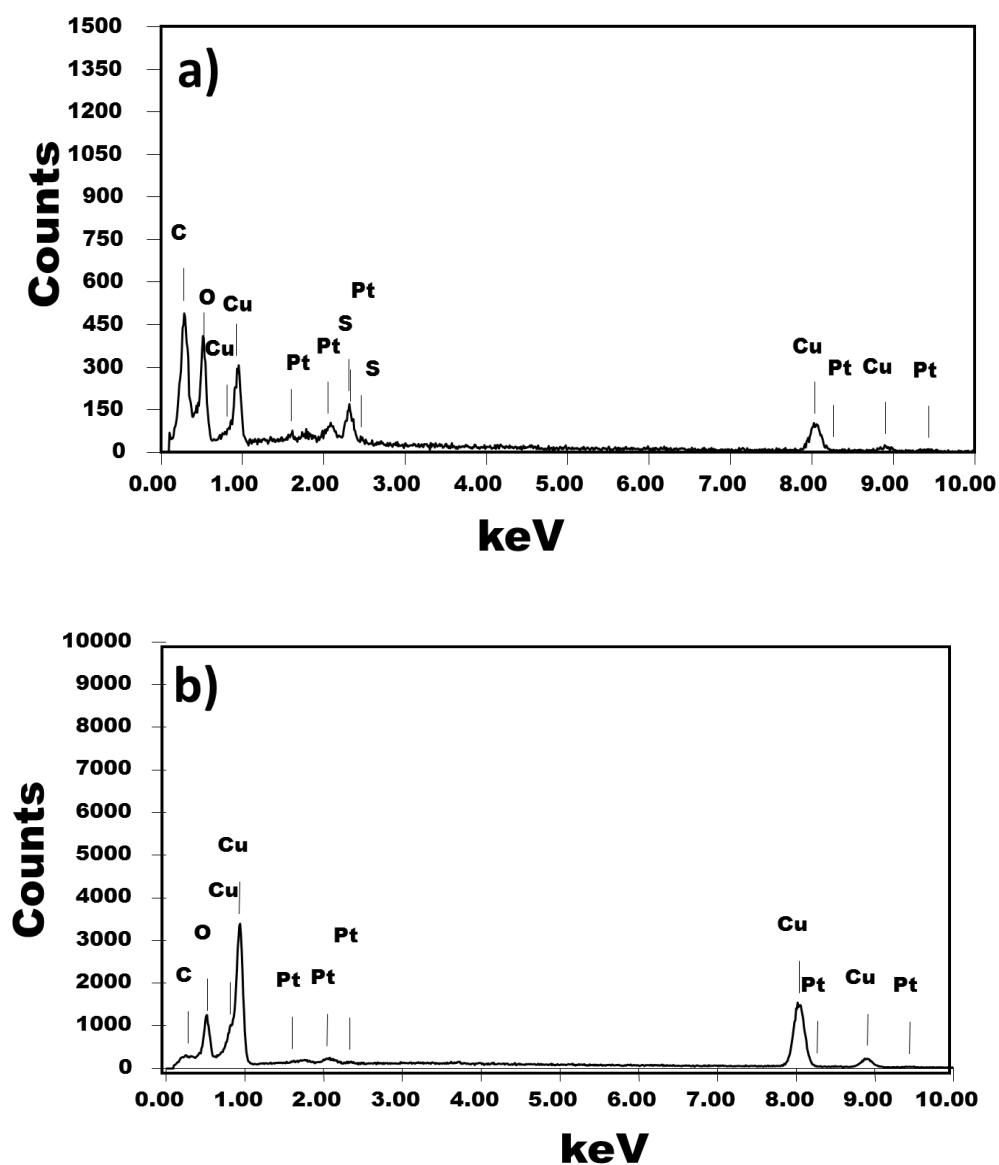

**Figure S2.** EDX analysis of ESM copper composite a) before calcination and b) after calcination

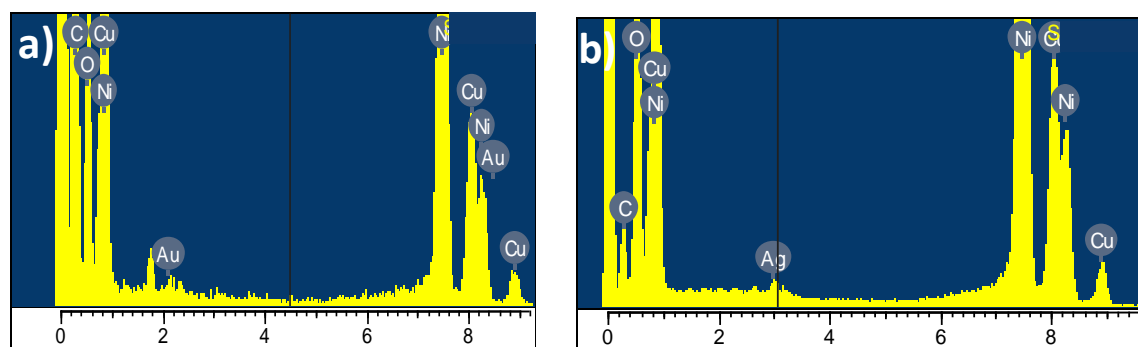

**Figure S3.** EDX analysis of a) Au NPs on NiO surface and b) Ag NPs on NiO surface

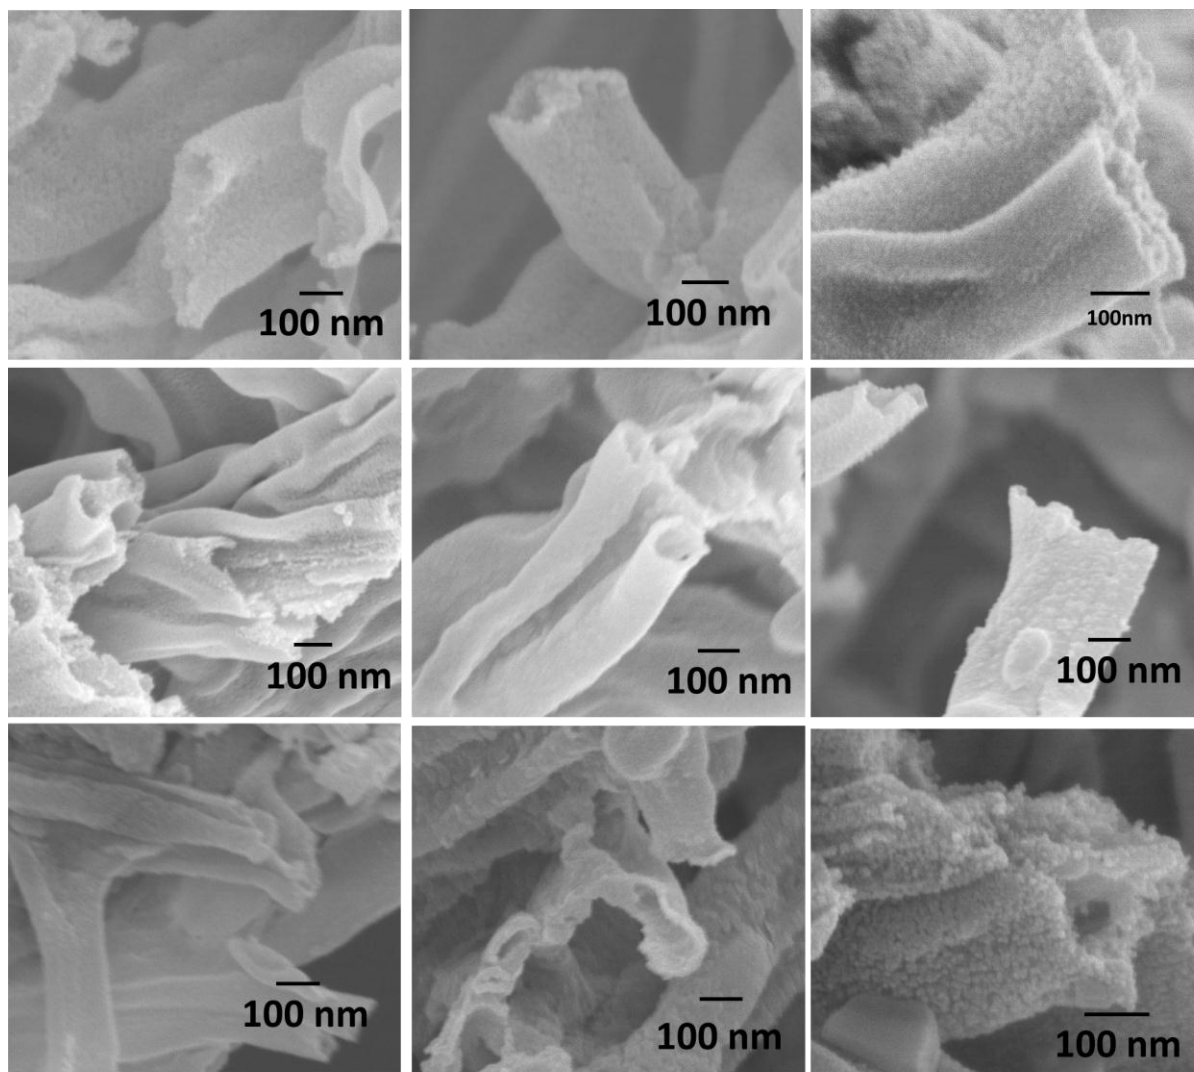

Figure S4. SEM images of NiO showing tube like structures
